# Supplementary material
Source: HighWire-hosted journal article supplement (https://erj.ersjournals.com/content/54/4/1900337)
Supplement: inline-supplementary-material-1 [file inline-supplementary-material-1.pdf]

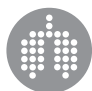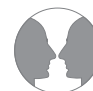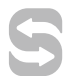

SHAREABLE PDF

# Transbronchial cryobiopsy for diffuse parenchymal lung disease: 30- and 90-day mortality

Jasleen Pannu<sup>1</sup>, Lance J. Roller<sup>2</sup>, Fabien Maldonado<sup>2</sup>, Robert J. Lentz<sup>2,3</sup>, Heidi Chen<sup>4</sup> and Otis B. Rickman<sup>2</sup>

**Affiliations:** <sup>1</sup>Division of Pulmonary, Critical Care, and Sleep Medicine, Ohio State University Medical Center, Columbus, OH, USA. <sup>2</sup>Division of Allergy, Pulmonary and Critical Care Medicine, Vanderbilt University Medical Center, Nashville, TN, USA. <sup>3</sup>Dept of Veterans Affairs Medical Center, Nashville, TN, USA. <sup>4</sup>Dept of Biostatistics, Vanderbilt University Medical Center, Nashville, TN, USA.

**Correspondence:** Jasleen Pannu, Division of Pulmonary and Critical Care Medicine, Ohio State University Medical Center, 410 W 10th Ave, Columbus, OH, USA. E-mail: [jasleen.Pannu@osumc.edu](mailto:jasleen.Pannu@osumc.edu)

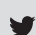

@ERSpublications

**This study suggests 30- and 90-day mortality after transbronchial cryobiopsy is higher than reported, confirming concerns raised about safety in advanced diffuse lung disease. Keen attention towards patient selection and procedural planning is warranted.** <http://bit.ly/2ySoZNq>

**Cite this article as:** Pannu J, Roller LJ, Maldonado F, *et al.* Transbronchial cryobiopsy for diffuse parenchymal lung disease: 30- and 90-day mortality. *Eur Respir J* 2019; 54: 1900337 [<https://doi.org/10.1183/13993003.00337-2019>].

This single-page version can be shared freely online.

## To the Editor:

Surgical lung biopsy (SLB) in diffuse parenchymal lung disease (DPLD) has been associated with significant in-hospital mortality (16% for non-elective patients, 1.7% for elective patients, overall 6.4%) [1, 2]. Overall 30-day mortality from SLB is reported at 1.5–4.5% from case series and 2.4% from a large European database [3]. Transbronchial cryobiopsy (TBC) has been proposed as a safer alternative to SLB for diagnosis of DPLD [4]. Existing studies on TBC report immediate procedural complications, but data on mortality at 30 and 90 days is sparse [2]. This is a report of 30- and 90-day mortality after TBC at a large volume interventional pulmonary practice in the USA examined in relation to indices of baseline disease severity. Individual case elements that led to practice changes are described. These descriptions elucidate clinical features potentially portending an increased risk of poor outcome.
